# Supplementary material for: Paenibacillus polymyxa and Bacillus cereus co-bacterial agent promotes ginseng resistance to diseases and improves yield, quality and pesticide degradation through regulating rhizosphere microbial community structure and potential function
Source: Research Square preprint supplement (doi:10.21203/rs.3.rs-4176005/v1), 2024-04-03
Supplement: Supplementary file 2 [file 1ed002c93e666b9468733d91.xlsx]

## Sheet: Sheet1
Table S10 Relative abundance at phylum level of the top 15 bacteria (%)
Phylum	CK	BS	PS	PB
Proteobacteria	33.6725±3.7807a	39.0874±2.1180a	21.2903±1.9105b	29.9428±2.8293ab
Acidobacteriota	29.3903±2.2399a	30.3978±0.6267a	28.0197±0.0201a	27.3067±0.5657a
Chloroflexi	8.2216±0.7582ab	5.0499±0.7584b	12.9917±3.3411a	10.3277±0.6014ab
Actinobacteriota	8.0883±0.9900a	5.9158±1.3804a	4.5933±0.4047a	7.3423±1.9108a
Gemmatimonadota	0.8296±0.1198b	0.7624±0.4325b	4.7273±0.9298ab	5.6510±2.4000a
Myxococcota	4.0226±0.6832a	3.4637±0.4149ab	2.1616±0.4612b	2.2540±0.2019b
Verrucomicrobiota	2.0936±0.8047a	2.8021±0.6840a	3.7339±1.7583a	1.1479±0.3161a
Patescibacteria	0.9272±0.1966a	2.0132±0.3563a	3.4070±2.5482a	2.5132±0.0990a
Bacteroidota	1.6781±0.4228ab	2.9432±0.7125a	0.8867±0.4270b	0.4298±0.1419b
Firmicutes	0.3774±0.0464b	0.4960±0.0718b	2.5821±0.7939a	1.3405±0.3992ab
Nitrospirota	1.6109±0.2706a	0.7238±0.1623b	0.9956±0.0774b	0.8688±0.1289b
Methylomirabilota	0.8163±0.1597ab	0.2821±0.1315b	2.0064±0.7881a	0.9773±0.3626ab
Planctomycetota	0.2390±0.0295a	0.1623±0.0416a	0.5193±0.2218a	0.6383±0.2736a
Armatimonadota	0.5147±0.0620a	0.4202±0.0936a	0.3062±0.0785a	0.3128±0.0656a
Values within the same column with different letters are significantly different (P < 0.05) by LSD test, values are means (SE) (n = 3).
