# Supplementary material for: Paenibacillus polymyxa and Bacillus cereus co-bacterial agent promotes ginseng resistance to diseases and improves yield, quality and pesticide degradation through regulating rhizosphere microbial community structure and potential function
Source: Research Square preprint supplement (doi:10.21203/rs.3.rs-4176005/v1), 2024-04-03
Supplement: Supplementary file 3 [file 240e84449d7f0ec122e061de.xlsx]

## Sheet: Sheet1
Table S11 Relative abundance at phylum level of the top 15 fungi (%)
Phylum	CK	BS	PS	PB
Basidiomycota	42.5928±1.9083b	44.5010±3.5784b	48.9397±2.8984ab	54.1007±0.5096a
Ascomycota	41.8908±2.4343a	40.7924±2.8375a	42.5259±1.5628a	39.3906±0.5064a
Mortierellomycota	8.7115±1.1283a	8.2965±1.6183a	3.2861±1.0871b	1.7472±0.1380b
Rozellomycota	1.6037±0.0839a	1.4864±0.1124a	1.3918±0.0751a	1.2677±0.1485a
Chytridiomycota	1.1152±0.1466a	1.0084±0.2265	0.3409±0.0277b	0.3117±0.0286b
Glomeromycota	0.2410±0.1340a	0.1086±0.0346a	0.0617±0.0079a	0.0536±0.0056a
Olpidiomycota	0.0575±0.0079a	0.0406±0.0124a	0.0606±0.0269a	0.0430±0.0056a
Zoopagomycota	0.0428±0.0127ab	0.0668±0.0121a	0.0241±0.0090bc	0.0059±0.0048c
Aphelidiomycota	0.0234±0.0087a	0.0186±0.0012a	0.0222±0.0057a	0.0158±0.0067a
Mucoromycota	0.0055±0.0014a	0.0078±0.0002a	0.0082±0.0024a	0.0068±0.0018a
Monoblepharomycota	0.0147±0.0074a	0.0037±0.0037a	0.0000±0.0000a	0.0080±0.0059a
Kickxellomycota	0.0092±0.0033a	0.0041±0.0024a	0.0004±0.0003a	0.0056±0.0056a
Blastocladiomycota	0.0010±0.0010a	0.0000±0.0000a	0.0015±0.0015a	0.0007±0.0007a
Neocallimastigomycota	0.0017±0.0010a	0.0000±0.0000a	0.0000±0.0000a	0.0011±0.0011a
Calcarisporiellomycota	0.0016±0.0016a	0.0000±0.0000a	0.0004±0.0004a	0.0004±0.0004a
Values within the same column with different letters are significantly different (P < 0.05) by LSD test, values are means (SE) (n = 3).
