# Supplementary material for: Paenibacillus polymyxa and Bacillus cereus co-bacterial agent promotes ginseng resistance to diseases and improves yield, quality and pesticide degradation through regulating rhizosphere microbial community structure and potential function
Source: Research Square preprint supplement (doi:10.21203/rs.3.rs-4176005/v1), 2024-04-03
Supplement: Supplementary file 4 [file 41c5990c6a9f23285a7bb741.xlsx]

## Sheet: Sheet1
Table S5 Analysis of 9 ginsenosides accumulative by application of Pp-7250 co-bacterial agent (%)
Ginsenoside	CK	BS	PS	PB
Rg1	0.0590±0.0003d	0.0737±0.0004c	0.0883±0.0010b	0.1077±0.0010a
Re	0.2181±0.0005d	0.2343±0.0077c	0.3021±0.0020b	0.4372±0.0039a
Rf	0.0104±0.0001d	0.0253±0.0002c	0.0284±0.0007b	0.0453±0.0003a
Rb1	0.1686±0.0005d	0.1745±0.0020c	0.2069±0.0002b	0.3227±0.0009a
Rg2	0.0266±0.0002d	0.0426±0.0005c	0.0484±0.0003b	0.0630±0.0006a
Rc	0.1458±0.0007c	0.1813±0.0011b	0.1820±0.0008b	0.2550±0.0132a
Rb2	0.0853±0.0012d	0.0887±0.0004c	0.1108±0.0006b	0.1681±0.0013a
Rb3	0.0144±0.0001c	0.0153±0.0017c	0.0172±0.0001b	0.0257±0.0002a
Rd	0.7887±0.0005d	0.0872±0.0024c	0.0997±0.0013b	0.1387±0.0008a
Total	0.8070±0.0011d	0.9230±0.0043c	10.839±0.0031b	1.5634±0.0109a
Values within the same column with different letters are significantly different (P < 0.05) by LSD test, values are means (SE) (n = 3).
