# Supplementary material for: Paenibacillus polymyxa and Bacillus cereus co-bacterial agent promotes ginseng resistance to diseases and improves yield, quality and pesticide degradation through regulating rhizosphere microbial community structure and potential function
Source: Research Square preprint supplement (doi:10.21203/rs.3.rs-4176005/v1), 2024-04-03
Supplement: Supplementary file 5 [file 77a0080c2468adbd25daca00.xlsx]

## Sheet: Sheet1
Table S13 Relative abundance at genus level of the top 20 fungi (%)
Phylum	CK	BS	PS	PB
Cortinarius	22.2870±1.0463b	22.8247±2.2115b	26.6247±1.0494ab	29.7341±0.6730a
Sebacina	6.1129±0.7463ab	5.4758±0.2059b	6.8075±0.3032ab	7.4744±0.2438a
Fusarium	7.1170±0.4355a	5.4758±0.2060a	5.9747±0.7159ab	5.1525±0.2015b
Clavulina	5.0690±0.2536a	5.4758±0.2061a	4.8976±1.7361a	6.4163±0.1687a
Mortierella	8.1234±1.5990a	5.4758±0.2062a	3.1718±1.0739b	1.6673±0.1302b
Tetracladium	4.1251±1.1088ab	5.4758±0.2063a	0.6059±0.3286b	0.3377±0.0955b
Russula	2.8230±0.0089b	5.4758±0.2064ab	2.9674±0.3001ab	3.5383±0.2280a
Aspergillus	1.4831±0.2211b	5.4758±0.2065b	4.6761±0.2441a	4.6969±0.0316a
Cladosporium	2.6869±0.3149a	5.4758±0.2066a	1.6858±0.1415b	1.3787±0.1065b
Paecilomyces	1.5209±0.3026b	5.4758±0.2067b	2.3449±0.0664a	2.2276±0.0560a
Humicola	0.0081±0.0081a	5.4758±0.2068a	0.0432±0.0118a	0.0129±0.0093a
Erysiphe	0.4691±0.1733b	5.4758±0.2069b	1.6486±0.2333a	1.8875±0.0812a
Plectosphaerella	1.0969±0.0462a	5.4758±0.2070a	0.9973±0.1133a	0.9210±0.1045a
Trechispora	0.2568±0.1024b	5.4758±0.2071b	1.8412±0.0502a	1.8188±0.0164a
Alternaria	0.9814±0.0640a	5.4758±0.2072a	0.7477±0.0365b	0.5747±0.0511b
Saitozyma	0.3886±0.0251b	5.4758±0.2073ab	0.5120±0.0539a	0.4022±0.0054ab
Ilyonectria	0.4788±0.0263a	5.4758±0.2074ab	0.4315±0.0546ab	0.3297±0.0272b
Pichia	0.3926±0.0235a	5.4758±0.2075a	0.4280±0.1302a	0.4083±0.0564a
Sodiomyces	0.3489±0.0260a	5.4758±0.2076a	0.3864±0.0241a	0.3038±0.0322a
Penicillium	0.0318±0.0135c	5.4758±0.2077c	0.4484±0.1398b	0.7367±0.0565a
Values within the same column with different letters are significantly different (P < 0.05) by LSD test, values are means (SE) (n = 3).
