# Supplementary material for: Paenibacillus polymyxa and Bacillus cereus co-bacterial agent promotes ginseng resistance to diseases and improves yield, quality and pesticide degradation through regulating rhizosphere microbial community structure and potential function
Source: Research Square preprint supplement (doi:10.21203/rs.3.rs-4176005/v1), 2024-04-03
Supplement: Supplementary file 6 [file 7c33edec3798ebc5e9cb9901.xlsx]

## Sheet: Sheet1
Table S7 Analysis of ginseng pesticide residue degradation rate by application of Pp-7250 co-bacterial agent (%)
Pesticide Types	BS	PS	PB
PCNB	35.37±0.0727b	56.48±0.0384a	60.88±0.0260a
Heptachlor	0.71±0.0863a	26.94±0.1054a	29.84±0.0673a
Aldrin	29.49±0.0423a	38.04±0.1636a	47.70±0.0399a
Oxo chlordane	24.96±0.1238a	23.20±0.1051a	28.30±0.0185a
Values within the same column with different letters are significantly different (P < 0.05) by LSD test, values are means (SE) (n = 3).
