# Supplementary material for: Paenibacillus polymyxa and Bacillus cereus co-bacterial agent promotes ginseng resistance to diseases and improves yield, quality and pesticide degradation through regulating rhizosphere microbial community structure and potential function
Source: Research Square preprint supplement (doi:10.21203/rs.3.rs-4176005/v1), 2024-04-03
Supplement: Supplementary file 8 [file 95c1566dbefe5117a0e7c348.xlsx]

## Sheet: Sheet1
Table S12 Relative abundance at genus level of the top 20 bacteria (%)
Phylum	CK	BS	PS	PB
Sphingomonas	2.8745±0.5928b	4.5478±0.6905a	0.9295±0.2334c	2.1510±0.1766bc
Bryobacter	1.8160±0.2565b	3.7730±0.5053a	1.7658±0.4139b	2.0202±0.1519b
Rhodanobacter	0.9991±0.1876b	1.7504±0.3950ab	0.9565±0.1950b	3.5204±1.3620a
Candidatus_Solibacter	2.0072±0.4119b	2.6098±0.0816ab	3.0368±0.3632a	2.3232±0.1491ab
RB41	3.0178±0.6510a	1.4226±0.1613b	0.5137±0.1214b	0.6917±0.1436b
Gemmatimonas	0.0533±0.0193b	0.0762±0.0492b	0.6542±0.3226ab	1.7308±0.8863a
Pseudolabrys	0.4500±0.1932b	1.6580±0.1555a	1.0306±0.3281ab	1.7076±0.4937a
MND1	1.3936±0.2530ab	1.6464±0.0704a	0.7522±0.1791c	0.9487±0.1066bc
Nitrospira	1.6037±0.2668a	0.7174±0.1619b	0.9796±0.0754b	0.8621±0.1255b
Ellin6067	1.0960±0.2039ab	1.5507±0.3172a	0.7411±0.1794b	0.7052±0.1410b
Haliangium	0.9315±0.0958a	1.1495±0.2830a	0.6618±0.0744a	0.8208±0.1144a
Aquicella	0.3087±0.0724b	0.8343±0.0679a	0.1947±0.0813b	0.2687±0.0591b
Reyranella	0.5591±0.0147b	0.7862±0.0308a	0.2541±0.0555c	0.3758±0.0391c
Bradyrhizobium	0.7042±0.0817a	0.6825±0.0973a	0.2041±0.1021b	0.2561±0.1288b
Lysobacter	0.5601±0.1911ab	0.6269±0.0774a	0.2219±0.0373bc	0.0832±0.0286c
Acidibacter	0.3967±0.0810ab	0.5841±0.0684a	0.1652±0.0466c	0.2360±0.0537bc
Bacillus	0.0803±0.0134b	0.1658±0.0150b	0.1754±0.0914b	0.56411±0.0466a
Nocardioides	0.3113±0.1693a	0.3293±0.0892a	0.5429±0.3248a	0.1002±0.0150a
Rhizobacter	0.3825±0.1126a	0.3164±0.0829a	0.0761±0.0161b	0.0231±0.0126b
Burkholderia_Caballeronia_Paraburkholderia	0.3374±0.0987a	0.3440±0.1576a	0.1734±0.0367a	0.0868±0.0116a
Values within the same column with different letters are significantly different (P < 0.05) by LSD test, values are means (SE) (n = 3).
