# Supplementary material for: Paenibacillus polymyxa and Bacillus cereus co-bacterial agent promotes ginseng resistance to diseases and improves yield, quality and pesticide degradation through regulating rhizosphere microbial community structure and potential function
Source: Research Square preprint supplement (doi:10.21203/rs.3.rs-4176005/v1), 2024-04-03
Supplement: Supplementary file 9 [file 9cbb053d4e1aeecbcdccd91d.xlsx]

## Sheet: Sheet1
Table S6 Analysis of ginseng pesticide residue content by application of Pp-7250 co-bacterial agent (mg/kg)
Pesticide Types	CK	BS	PS	PB
PCNB	0.3973±0.0531a	0.2576±0.0571b	0.1728±0.0259c	0.1558±0.0227c
Heptachlor	0.4963±0.0814a	0.3554±0.0711a	0.4847±0.0128a	0.3534±0.1104a
Aldrin	0.5486±0.0618a	0.3882±0.0727b	0.3289±0.1110b	0.2891±0.0660b
Oxo chlordane	0.1536±0.0131a	0.1167±0.0405a	0.1167±0.0199a	0.1099±0.0047a
Values within the same column with different letters are significantly different (P < 0.05) by LSD test, values are means (SE) (n = 3).
