# Supplementary material for: Paenibacillus polymyxa and Bacillus cereus co-bacterial agent promotes ginseng resistance to diseases and improves yield, quality and pesticide degradation through regulating rhizosphere microbial community structure and potential function
Source: Research Square preprint supplement (doi:10.21203/rs.3.rs-4176005/v1), 2024-04-03
Supplement: Supplementary file 12 [file 9fb5a75043394ad46068166b.xlsx]

## Sheet: Sheet1
Table S15 Correlation analysis of fungi functions with ginseng diseases and growth indicators
	Plant Pathogen	Animal Pathogen
Survival rate	-0.8862**	-0.9247**
Root infection rate	0.7063*	0.7483**
Stem leaves infection rate	0.8671**	0.8951**
Plant height	-0.8951**	-0.8601**
Root length	-0.8741**	-0.8462**
Petiole length	-0.9091**	-0.8741**
Root diameter	-0.6900*	-0.6235*
Stem diameter	-0.5289	-0.5849*
Leaf length	-0.7333**	-0.6105*
Leaf width	-0.5044	-0.4483
Plant weight	-0.8947**	-0.8316**
Root weight	-0.8601**	-0.7483**
Stem leaves weight	-0.6089*	-0.6974*
(*P < 0.05; ** P < 0.01) (n=3).
