# Supplementary material for: Paenibacillus polymyxa and Bacillus cereus co-bacterial agent promotes ginseng resistance to diseases and improves yield, quality and pesticide degradation through regulating rhizosphere microbial community structure and potential function
Source: Research Square preprint supplement (doi:10.21203/rs.3.rs-4176005/v1), 2024-04-03
Supplement: Supplementary file 14 [file d7d4447fc173286ebe63b8ba.xlsx]

## Sheet: Sheet1
Table S3 Analysis of ginseng disease incidence by application of Pp-7250 co-bacterial agent
Index	CK	BS	PS	PB
The number of survivor/a	19.67±0.88d	24.33±0.88c	28.33±0.88b	34.00±0.58a
Survival rate/%	56.19±4.36d	69.52±2.52c	80.95±2.52b	97.14±1.65a
Number of root infection/a	5.67±0.33a	5.00±0.00ab	3.67±0.67bc	2.33±0.67c
Root infection rate/%	28.97±2.41a	21.99±1.67a	12.99±2.46b	6.92±2.03b
Root relative efficacy/%	0	23.45±6.43c	55.66±5.36b	76.76±6.10a
Number of Stem leaves infection/a	7.33±0.67a	5.67±0.67ab	4.67±0.33b	3.67±0.88b
Stem leaves infection rate/%	37.67±4.73a	23.16±1.90ab	16.45±0.89bc	10.82±2.69c
Stem leaves relative efficacy/%	0c	36.95±7.25b	54.82±6.64ab	68.39±11.59a
Values within the same column with different letters are significantly different (P < 0.05) by LSD test, values are means (SE) (n = 3).
