# Supplementary material for: Paenibacillus polymyxa and Bacillus cereus co-bacterial agent promotes ginseng resistance to diseases and improves yield, quality and pesticide degradation through regulating rhizosphere microbial community structure and potential function
Source: Research Square preprint supplement (doi:10.21203/rs.3.rs-4176005/v1), 2024-04-03
Supplement: Supplementary file 15 [file f0e73fafdf2da95e56fc7e2a.xlsx]

## Sheet: Sheet1
Table S4 Analysis of ginseng agronomic traits by application of application of Pp-7250 co-bacterial agent
Index	CK	BS	PS	PB
Plant height/cm	11.25±0.03d	12.31±0.06c	13.53±0.08b	15.45±0.54a
Root length/cm	7.13±0.03c	7.57±0.09bc	7.79±0.14b	8.25±0.21a
Petiole length/cm	1.98±0.06c	2.13±0.04bc	2.31±0.06b	2.84±0.28a
Root diameter/cm	5.73±0.09a	5.76±0.30a	5.94±0.12a	6.24±0.14a
Stem diameter/mm	0.46±0.02b	0.51±0.01ab	0.54±0.02ab	0.55±0.04a
Leaf length/cm	3.20±0.13a	3.19±0.18a	3.30±0.13a	3.50±0.02a
Leaf width/cm	1.72±0.08a	1.79±0.10a	1.75±0.03a	1.88±0.02a
Plant weight/g	1.05±0.02c	1.15±0.09bc	1.30±0.06ab	1.40±0.04a
Root weight/g	0.91±0.02b	1.00±0.07ab	1.13±0.08a	1.18±0.05a
Stem leaves weight/g	0.14±0.01a	0.15±0.03a	0.17±0.03a	0.22±0.01a
Values within the same column with different letters are significantly different (P < 0.05) by LSD test, values are means (SE) (n = 3).
